# Supplementary material
Source: publisher figshare collection journal article supplement (https://acs.figshare.com/ndownloader/files/11770817)
Supplement: Supplementary file 1 [file 11770817]

## Characterization of polymers

**Table S1. Number-Average Molecular Weight ( $M_n$ ) and Molecular Weight Distribution ( $M_w/M_n$ ) of the Block Copolymers**

| Polymers                                     | $M_v$<br>$\times 10^{-4}$ | $M_w$ (SLS)<br>$\times 10^{-4}$ | $M_n$ (NMR)<br>$\times 10^{-4}$ | $M_n$ (GPC)<br>$\times 10^{-4}$ | $M_w/M_n$ |
|----------------------------------------------|---------------------------|---------------------------------|---------------------------------|---------------------------------|-----------|
| PAMPS275                                     | 4.30                      | 5.70                            |                                 |                                 | 1.18      |
| PMPC20- <i>b</i> -PAMPS198                   |                           |                                 | 4.72                            | 2.29                            | 1.25      |
| PAMPS48- <i>b</i> -PEG227- <i>b</i> -PAMPS48 |                           |                                 | 3.26                            | 2.32                            | 1.42      |
| PEG47- <i>b</i> -PAMPS108                    |                           |                                 | 2.71                            | 2.30                            | 1.17      |
| PEG47- <i>b</i> -PAMPS27                     |                           |                                 | 0.90                            | 0.67                            | 1.15      |

**Table S2.  $^1\text{H}$  NMR data**

| Polymer                                      | Chemical shifts                                                                                                                                                                                                   |
|----------------------------------------------|-------------------------------------------------------------------------------------------------------------------------------------------------------------------------------------------------------------------|
| PAMPS275                                     | $^1\text{H}$ NMR (500 MHz, $\text{D}_2\text{O}$ ): $\delta$ ppm, 3.14-3.61 (m, 2H), 1.89-2.29 (m, 1H), 1.14-2.28 (m, 8H)                                                                                          |
| PMPC20- <i>b</i> -PAMPS198                   | $^1\text{H}$ NMR (500 MHz, $\text{D}_2\text{O}$ ): $\delta$ ppm, 4.32 (m, 40H), 4.23 (m, 40H), 4.10 (m, 40H), 3.69 (m, 40H), 3.08-3.52 (m+s, 576H), 1.89-2.29 (m, 198H), 1.14-2.28 (m, 1624H), 0.28-1.14 (m, 60H) |
| PAMPS48- <i>b</i> -PEG227- <i>b</i> -PAMPS48 | $^1\text{H}$ NMR (500 MHz, $\text{D}_2\text{O}$ ): $\delta$ ppm, 3.72 (m, 908H), 3.14-3.61 (m, 192H), 1.89-2.29 (m, 96H), 1.14-2.28 (m, 576H)                                                                     |
| PEG47- <i>b</i> -PAMPS108                    | $^1\text{H}$ NMR (500 MHz, $\text{D}_2\text{O}$ ): $\delta$ ppm, 3.72 (m, 188H), 3.14-3.61 (m, 216H), 1.89-2.29 (m, 108H), 1.14-2.28 (m, 864H)                                                                    |
| PEG47- <i>b</i> -PAMPS27                     | $^1\text{H}$ NMR (500 MHz, $\text{D}_2\text{O}$ ): $\delta$ ppm, 3.72 (m, 188H), 3.14-3.61 (m, 54H), 1.89-2.29 (m, 27H), 1.14-2.28 (m, 216H)                                                                      |

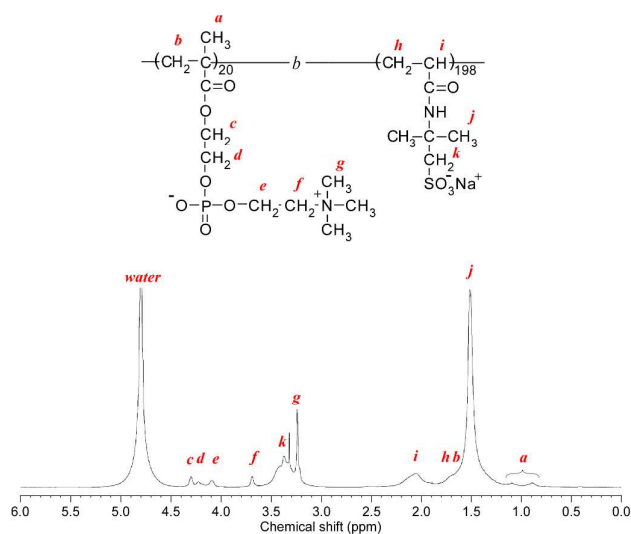

Figure S1.  $^1\text{H}$  NMR spectrum for PMPC20-*b*-PAMPS198 in  $\text{D}_2\text{O}$  at  $20^\circ\text{C}$ .

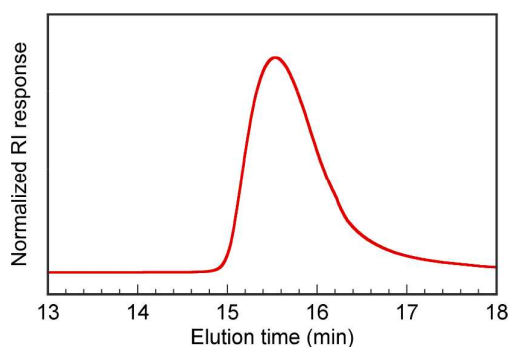

Figure S2. GPC elution curve for PMPC20-*b*-PAMPS198 using phosphate buffer (50 mM, pH 9) containing 10 vol % acetonitrile as eluent.

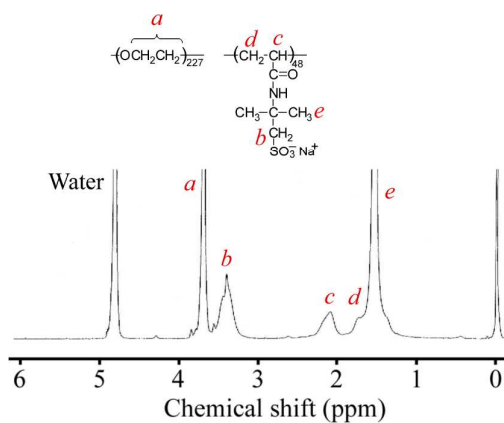

Figure S3.  $^1\text{H}$  NMR spectrum for PAMPS48-*b*-PEG227-*b*-PAMPS48 in  $\text{D}_2\text{O}$  at  $20^\circ\text{C}$ .

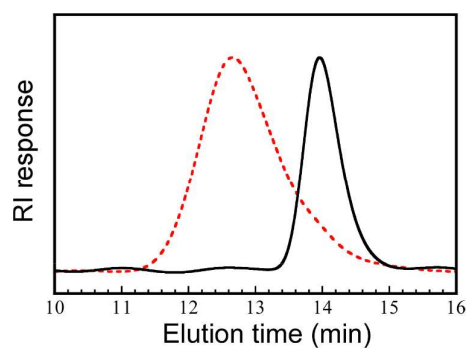

**Figure S4.** GPC elution curves for HO-PEG-OH (—) and PAMPS48-*b*-PEG227-*b*-PAMPS48 (---) using phosphate buffer (50 mM, pH 9) containing 10 vol % acetonitrile as eluent structures of the block copolymers.

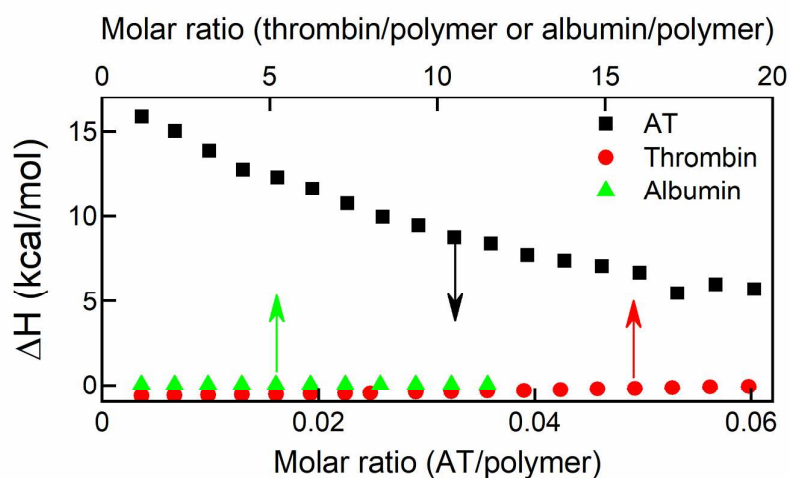

**Figure S5.** The heat of interaction between PEG47-*b*-PAMPS108 polymer with AT and thrombin. Albumin was used as a non-interacting reference protein ( $c_{\text{PEG47-}b\text{-PAMPS108}}=1.35 \text{ mg/mL}$ ).

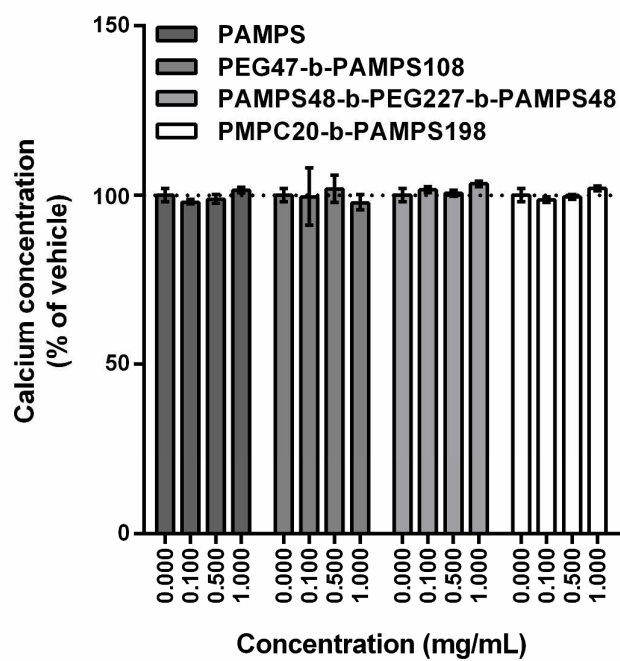

**Figure S6.** Effects of PAMPS-based polymers on calcium concentration. Results are shown as median with lower and upper limits,  $n = 5$ .

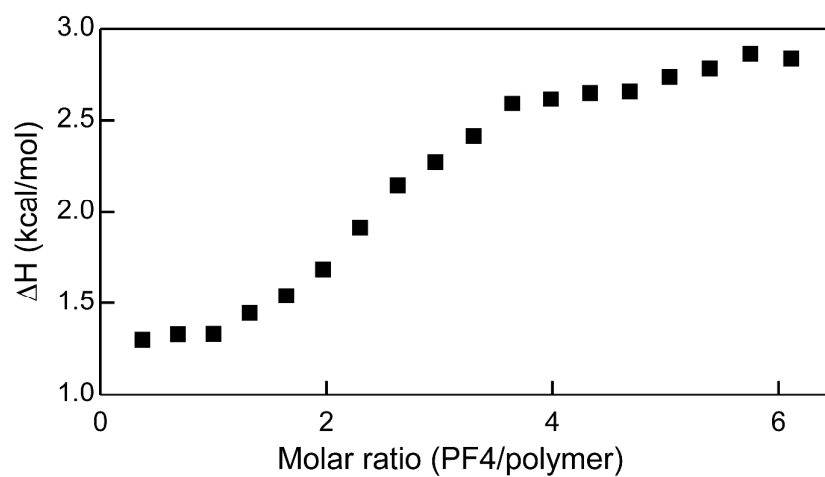

**Figure S7.** The heat of interaction between PEG47-*b*-PAMPS108 polymer and PF4. The concentration of PEG47-*b*-PAMPS108 was 1.35 mg/mL.

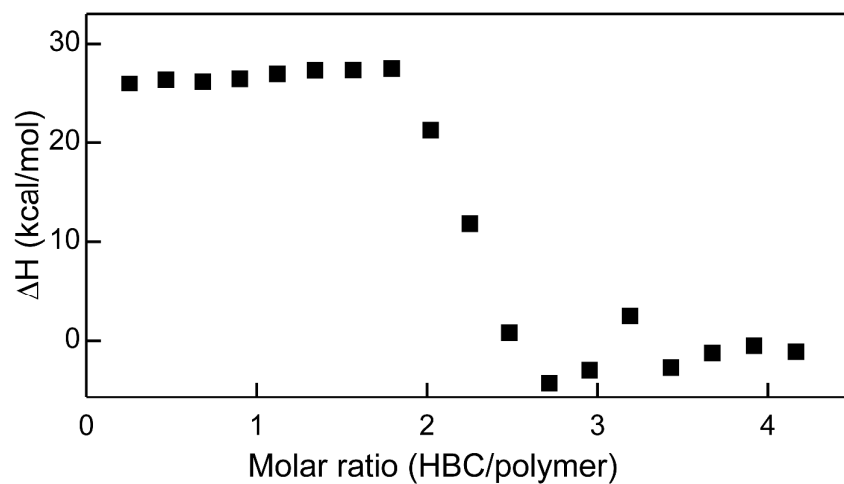

**Figure S8.** The heat of interaction between PEG47-*b*-PAMPS108 and HBC. The concentration of PEG47-*b*-PAMPS108 was 1.35 mg/mL.

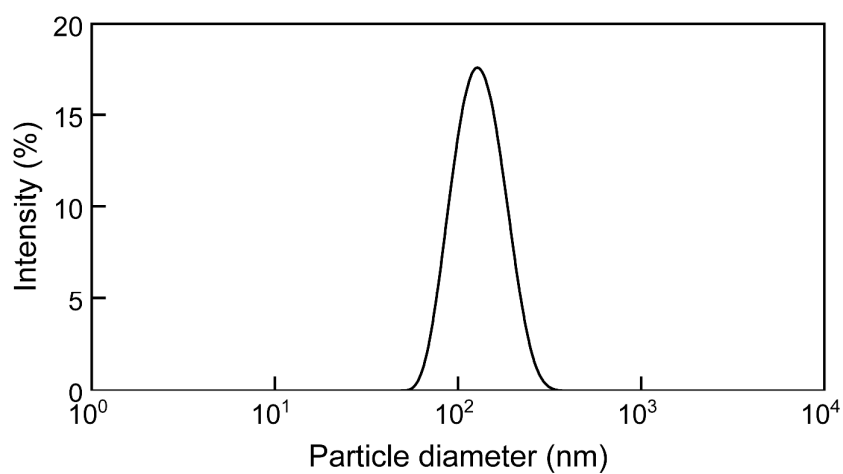

**Figure S9.** The size distribution of the PIC complexes formed by HBC (c=12 mg/mL) and PEG47-*b*-PMAPTAC108 (c=12 mg/mL) in PBS measured using DLS technique.

**Table S3. Complete blood count results after incubation of blood with the polymers solution in the final concentration of 0.01-1 mg/mL.**

|      | Conc.<br>(mg/mL) | PAMPS275                | PEG47- <i>b</i> -<br>PAMPS108 | PAMPS48- <i>b</i> -<br>PEG227- <i>b</i> -<br>PAMPS48 | PMPC20- <i>b</i> -<br>PAMPS198 |
|------|------------------|-------------------------|-------------------------------|------------------------------------------------------|--------------------------------|
| PLT  | 0.01             | 101.8<br>(84.1-109.0)   | 93.7<br>(85.7-99.9)           | 96.7<br>(84.7-104.0)                                 | 101.0<br>(80.8-109.6)          |
|      | 0.1              | 102.7<br>(87.7-109.0)   | 95.4<br>(85.1-99.9)           | 98.0<br>(89.4-102.5)                                 | 100.2<br>(79.9-107.1)          |
|      | 1                | 93.8<br>(83.0-102.4)    | 95.6<br>(89.4-100.6)          | 88.7*<br>(85.3-96.9)                                 | 91.6<br>(79.4-99.3)            |
| zzzw | 0.01             | 104.6<br>(99.5-112.2)   | 98.4<br>(98.4-102.5)          | 102.5<br>(94.3-102.5)                                | 104.6<br>(96.9-107.1)          |
|      | 0.1              | 104.6<br>(99.5-109.7)   | 102.5<br>(90.2-106.6)         | 98.4<br>(94.3-102.5)                                 | 102.0<br>(99.5-107.1)          |
|      | 1                | 99.5<br>(91.8-102.0)    | 98.4<br>(90.2-102.5)          | 98.4<br>(86.1-98.4)                                  | 102.0<br>(91.8-104.6)          |
| RBC  | 0.01             | 99.7<br>(99.2-102.0)    | 98.8<br>(92.2-100.8)          | 100.5<br>(97.9-104.8)                                | 100.9<br>(100.4-101.0)         |
|      | 0.1              | 101.4<br>(100.9-102.5)  | 100.8<br>(93.7-104.5)         | 99.1<br>(97.4-102.5)                                 | 100.5<br>(97.9-103.5)          |
|      | 1                | 104.4*<br>(102.2-108.9) | 99.3<br>(98.8-106.5)          | 102.7<br>(100.6-104.2)                               | 104.4*<br>(101.4-104.9)        |
| HGB  | 0.01             | 101.3<br>(99.7-102.1)   | 99.5<br>(95.5-100.3)          | 102.8<br>(97.1-105.2)                                | 100.5<br>(100.5-100.5)         |
|      | 0.1              | 101.3<br>(101.3-103.7)  | 100.3<br>(97.1-104.4)         | 100.3<br>(97.1-102.8)                                | 102.1<br>(97.3-102.1)          |
|      | 1                | 105.3*<br>(102.1-109.3) | 100.3<br>(98.7-105.2)         | 102.8<br>(100.3-103.6)                               | 101.0*<br>(100.4-101.5)        |
| HCT  | 0.01             | 101.0<br>(98.6-101.5)   | 98.8<br>(92.1-100.9)          | 100.3<br>(97.9-105.3)                                | 99.8<br>(97.4-103.6)           |
|      | 0.1              | 101.8<br>(101.0-103.9)  | 100.9<br>(95.0-104.7)         | 99.1<br>(98.2-103.2)                                 | 94.8<br>(92.5-98.5)            |
|      | 1                | 104.2*<br>(102.4-110.5) | 100.0<br>(97.7-106.7)         | 102.3<br>(100.9-104.7)                               | 104.5*<br>(100.1-105.7)        |
| MCV  | 0.01             | 100.4<br>(100.4-102.2)  | 99.0<br>(99.0-99.0)           | 99.0<br>(99.0-100.7)                                 | 100.4<br>(100.4-100.4)         |
|      | 0.1              | 100.4<br>(100.4-102.2)  | 100.7<br>(99.0-100.7)         | 100.7<br>(99.0-100.7)                                | 100.4<br>(100.4-100.4)         |
|      | 1                | 100.4<br>(100.4-102.2)  | 99.0<br>(99.0-100.7)          | 100.7<br>(99.0-100.7)                                | 100.4<br>(98.6-100.4)          |
| MCH  | 0.01             | 100.9<br>(99.9-101.8)   | 100.0<br>(99.5-103.8)         | 100.5<br>(99.5-101.9)                                | 99.9<br>(99.4-100.4)           |
|      | 0.1              | 100.4<br>(99.4-101.4)   | 100.5<br>(99.5-103.8)         | 101.0<br>(99.0-101.0)                                | 100.9<br>(98.9-101.4)          |
|      | 1                | 100.9<br>(99.9-100.9)   | 100.0<br>(99.0-101.0)         | 100.5<br>(97.6-101.4)                                | 100.4<br>(99.4-101.4)          |
| MCHC | 0.01             | 100.6<br>(100.1-102.0)  | 100.3<br>(99.8-104.2)         | 100.6<br>(99.5-102.5)                                | 99.8<br>(99.0-100.6)           |
|      | 0.1              | 100.1<br>(99.6-100.9)   | 100.1<br>(98.9-102.6)         | 99.2<br>(98.4-102.3)                                 | 101.2<br>(98.8-102.3)          |
|      | 1                | 100.1<br>(99.0-101.7)   | 99.5<br>(98.7-102.6)          | 100.1<br>(98.4-101.2)                                | 100.4<br>(98.8-102.8)          |

**Abbreviations:** WBC, white blood cells; RBC, red blood cells; HGB, hemoglobin; HCT, hematocrit; MCV, mean corpuscular volume; MCH, mean corpuscular hemoglobin; MCHC, mean corpuscular hemoglobin concentration; PLT, blood platelets. \*p<0.05 vs whole blood without studied polymers, Mann-Whitney test.

Results are expressed as a percentage of the control samples and shown as a median with lower and upper limits, n = 5.

**Table S4. Complete blood count results in rats treated intravenously with PAMPS-based polymers administered at the dose of 6 mg/kg.**

|                                          | Vehicle    | PAMPS            | PEG47- <i>b</i> -<br>PAMPS108 | PAMPS48- <i>b</i> -<br>PEG227- <i>b</i> -<br>PAMPS48 | PMPC20- <i>b</i> -<br>PAMPS198 |
|------------------------------------------|------------|------------------|-------------------------------|------------------------------------------------------|--------------------------------|
| WBC,<br>10 <sup>3</sup> /mm <sup>3</sup> | 2.5 ± 0.5  | 4.3 ± 0.9<br>*** | 4.1 ± 1.0<br>***              | 4.6 ± 0.9<br>***                                     | 4.2 ± 1.0<br>***               |
| RBC,<br>10 <sup>6</sup> /mm <sup>3</sup> | 6.4 ± 0.7  | 6.3 ± 0.5        | 6.7 ± 0.8                     | 6.6 ± 0.7                                            | 6.4 ± 0.5                      |
| HGB,<br>g/dL                             | 13.6 ± 0.7 | 13.3 ± 0.7       | 13.9 ± 1.0                    | 13.7 ± 0.8                                           | 13.6 ± 0.7                     |
| HCT,<br>%                                | 40.0 ± 2.9 | 39.6 ± 2.3       | 41.4 ± 3.8                    | 40.7 ± 3.0                                           | 40.4 ± 2.5                     |
| MCV,<br>μm <sup>3</sup>                  | 62.3 ± 2.6 | 62.8 ± 2.6       | 62.3 ± 3.1                    | 62.3 ± 2.1                                           | 62.0 ± 2.0                     |
| MCH,<br>pg                               | 21.3 ± 1.7 | 21.2 ± 1.4       | 21.0 ± 1.5                    | 21.0 ± 1.4                                           | 21.2 ± 1.2                     |
| MCHC,<br>g/dL                            | 34.2 ± 1.5 | 33.7 ± 1.1       | 33.7 ± 1.2                    | 33.7 ± 1.1                                           | 33.7 ± 0.9                     |
| PLT,<br>10 <sup>3</sup> /mm <sup>3</sup> | 667 ± 65   | 497 ± 79<br>***  | 653 ± 68                      | 665 ± 46                                             | 562 ± 103<br>*                 |

**Abbreviations:** WBC, white blood cells; RBC, red blood cells; HGB, hemoglobin; HCT, hematocrit; MCV, mean corpuscular volume; MCH, mean corpuscular hemoglobin; MCHC, mean corpuscular hemoglobin concentration; PLT, blood platelets. \*p<0.05, \*\*\*p<0.001 vs vehicle, unpaired Student's *t*-test. Results are shown as mean ± SD, n = 8-10.
